# Supplementary material for: Facile Green, Room-Temperature Synthesis of Gold Nanoparticles Using Combretum erythrophyllum Leaf Extract: Antibacterial and Cell Viability Studies against Normal and Cancerous Cells
Source: MDPI journal article supplement (doi:10.3390/antibiotics10080893), 2021-07-22
Supplement: s1 [file s1]

# Facile Green, Room-Temperature Synthesis of Gold Nanoparticles Using *Combretum Erythrophyllum* Leaf Extract: Antibacterial and Cell Viability Studies against Normal and Cancerous Cells

Supporting Document.

Olufunto T. Fanoro <sup>1,3</sup>, Sundararajan Parani <sup>2,3</sup>, Rodney Maluleke <sup>2,3</sup>, Thabang C. Lebepe <sup>2,3</sup>, R. Jose Varghese <sup>2,3</sup> Vuyo Mavumengwana <sup>1</sup> and Oluwatobi S. Oluwafemi <sup>2,3\*</sup>

<sup>1</sup> Department of Biotechnology, University of Johannesburg, Doornfontein, Johannesburg 2028, South Africa

<sup>2</sup> Department of Chemical Sciences (formerly applied Chemistry), University of Johannesburg, P.O. Box 17011, Doornfontein, Johannesburg 2028, South Africa

<sup>3</sup> Centre for Nanomaterials Sciences Research, University of Johannesburg, Johannesburg, South Africa

\* Corresponding author: oluwafemi.oluwatobi@gmail.com

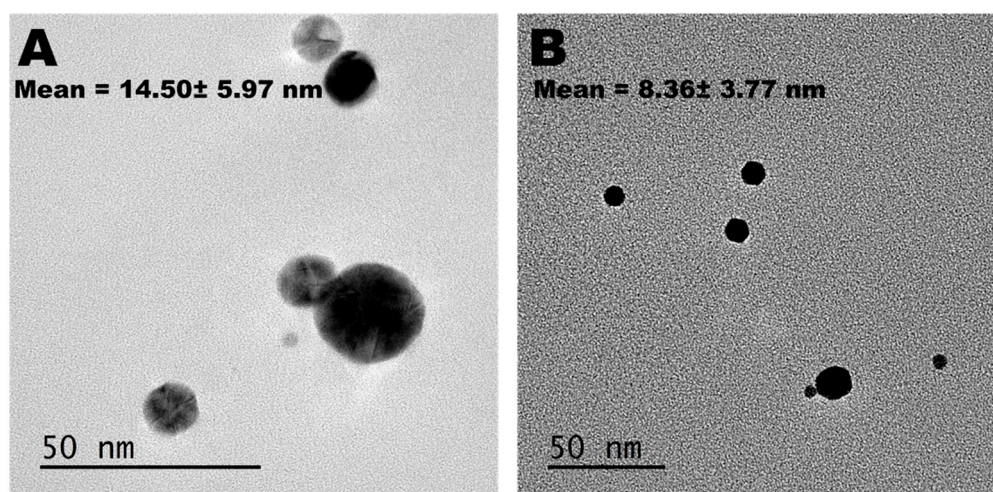

**Figure S1.** TEM Image of AuNPs synthesized using 0.5 mL of CE (A) at 0 min (B) at 48 h.

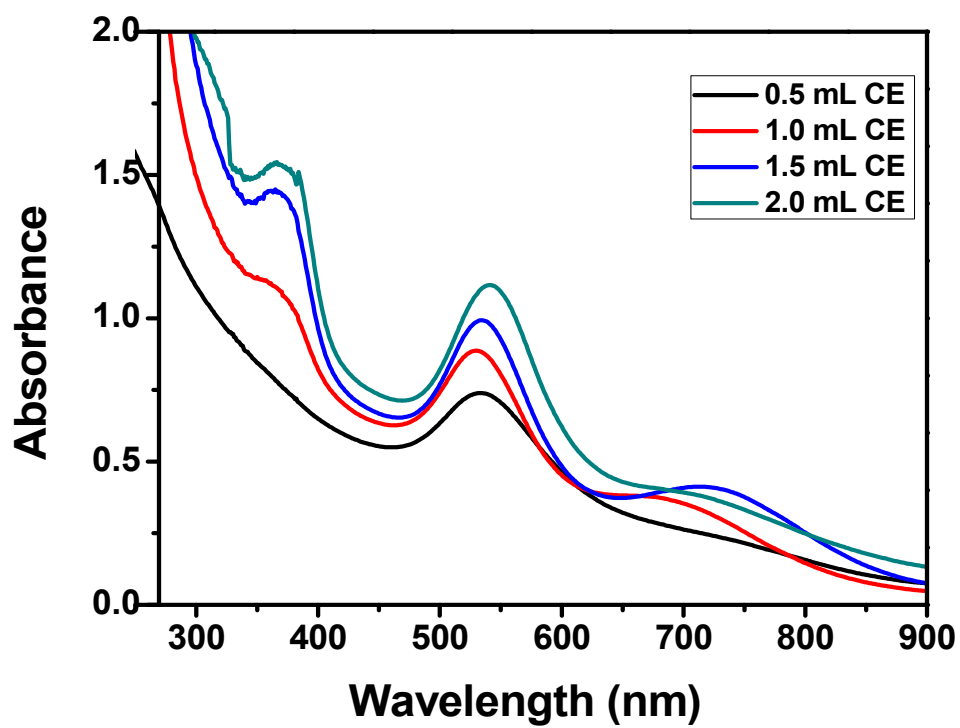

(A)

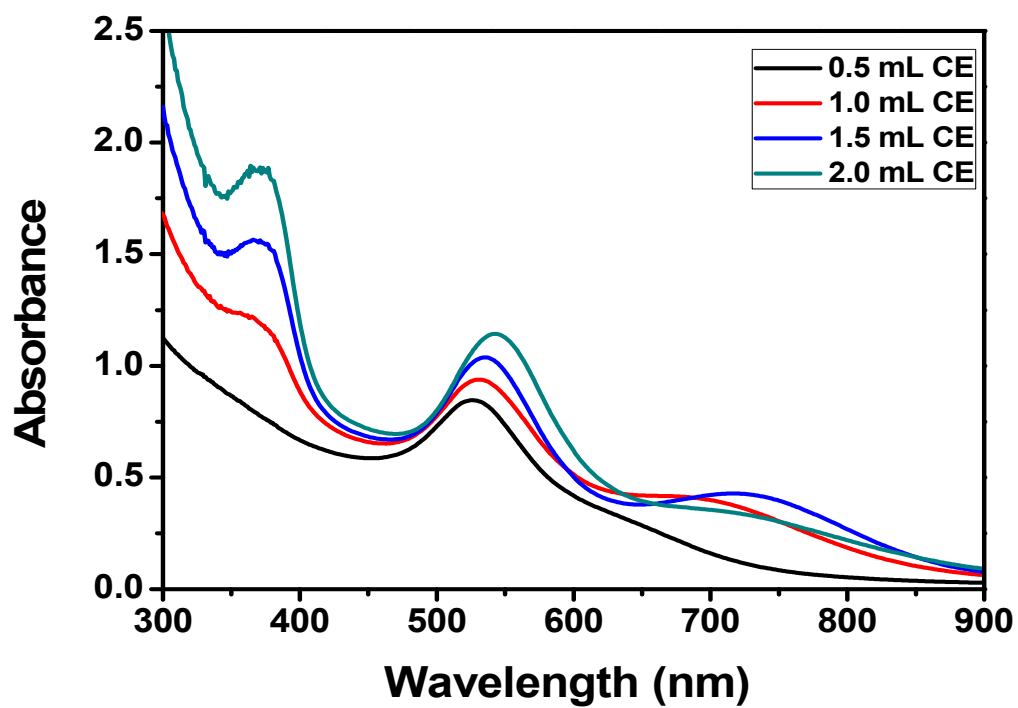

(B)

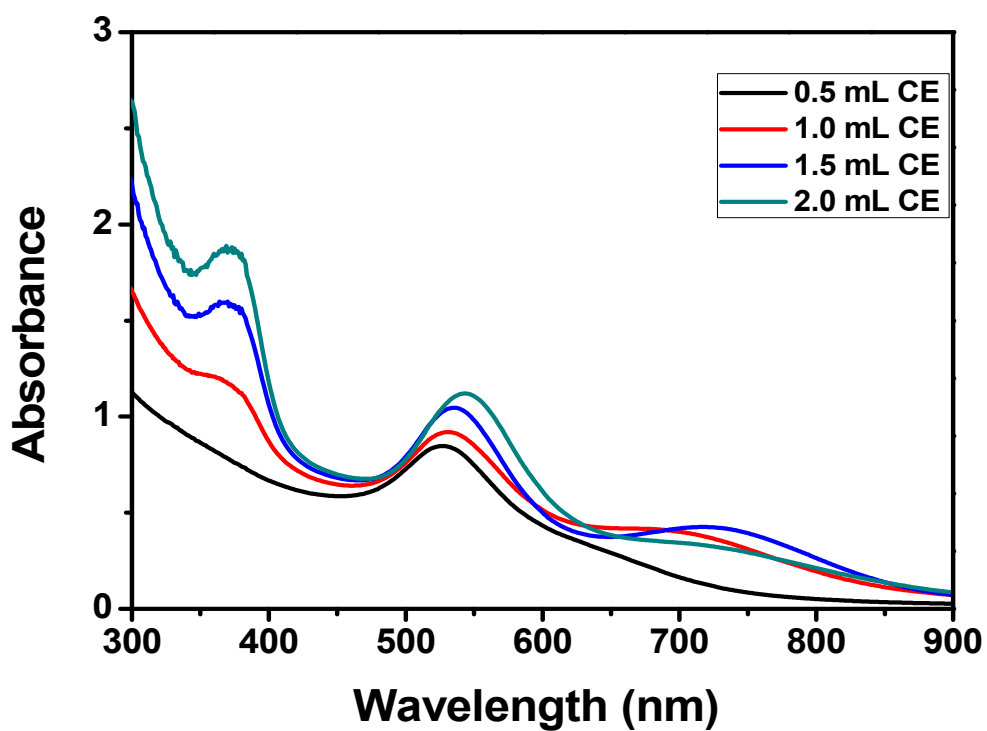

(C)

**Figure S2.** (A). Absorption spectra of AuNPs using Different volume of CE at 0 min. (B) Absorbance spectra of AuNPs using different volumes of CE at 24 h. (C) Absorbance spectra of AuNPs using different volumes of CE at 48 h.

**Table S1.** Wavelength and Absorption of the AuNPs using different volumes of CE.

| 1. | S/N   | 0.5 mL CE               |                 | 1.0 mL CE               |                 | 1.5 mL CE               |                 | 2.0 mL CE               |                 |
|----|-------|-------------------------|-----------------|-------------------------|-----------------|-------------------------|-----------------|-------------------------|-----------------|
|    |       | Wave-<br>Length<br>(nm) | Absor-<br>bance | Wave-<br>Length<br>(nm) | Absor-<br>bance | Wave-<br>Length<br>(nm) | Absor-<br>bance | Wave-<br>Length<br>(nm) | Absor-<br>bance |
| 2. | 0 min | 533                     | 0.74            | 530                     | 0.89            | 534                     | 0.99            | 541                     | 1.12            |
| 3. | 24h   | 526                     | 0.85            | 531                     | 0.94            | 535                     | 1.0             | 542                     | 1.14            |
| 0  | 48 h  | 526                     | 0.85            | 532                     | 0.92            | 535                     | 1.05            | 543                     | 1.12            |

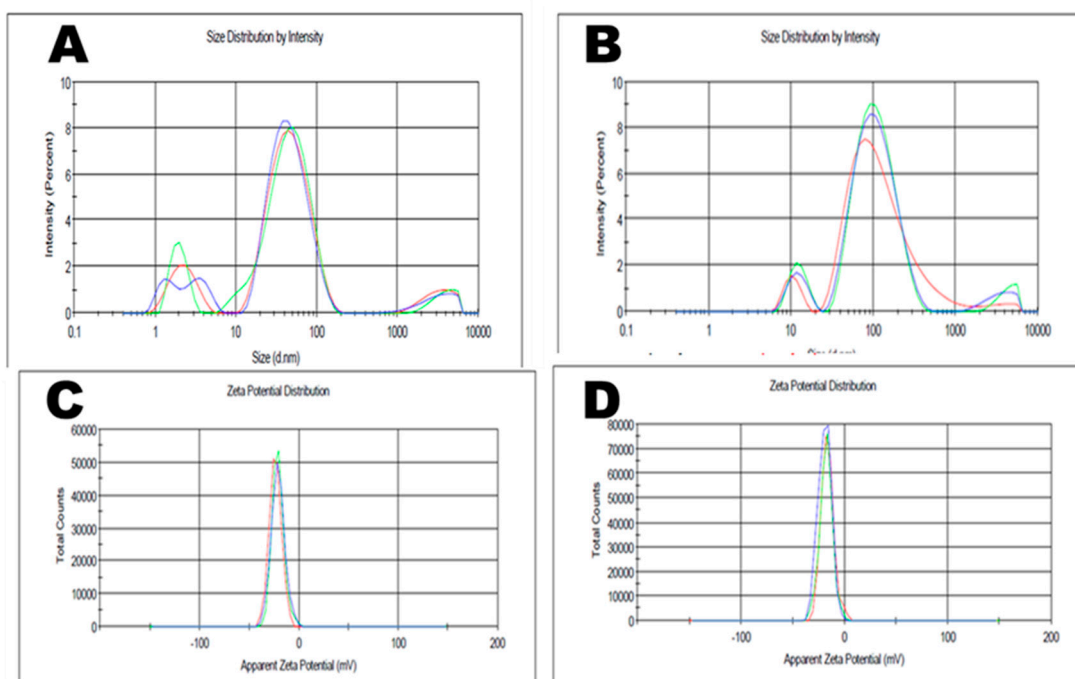

**Figure S3.** Particle size distribution of AuNPs using (A) 1mL CE (B) 2 mL CE, Zeta potential distribution of AuNPs using (C) 1 mL CE (D) 2 mL CE at 48 h.

**Table S2.** DLS Analysis of AuNPs AT 48 h.

| S/N | Sample               | Size (d)nm | Zeta (mV) |
|-----|----------------------|------------|-----------|
| 1.  | AuNPs 1.0 mL CE 48 h | 26.39      | -18.5     |
| 2.  | AuNPs 2.0 mL CE 48 h | 73.77      | -19.2     |
| 3.  | CE Extract           |            | -15.6     |

**Table S3.** Wavelength (nm) of AuNPs using different volumes of CE for 60 Days.

| S/N | Sample    | Day 0  | Day 15 | Day 30 | Day 45 | Day 60 |
|-----|-----------|--------|--------|--------|--------|--------|
| 1.  | 0.5 mL CE | 526 nm | 535 nm | 557 nm | 578    | 591    |
| 2.  | 1.0mL CE  | 532 nm | 532 nm | 532 nm | 532    | 533    |
| 3.  | 1.5 mL CE | 535 nm | 535 nm | 535 nm | 535    | 536    |
| 4.  | 2.0 mL CE | 543 nm | 543 nm | 544 nm | 544    | 544    |

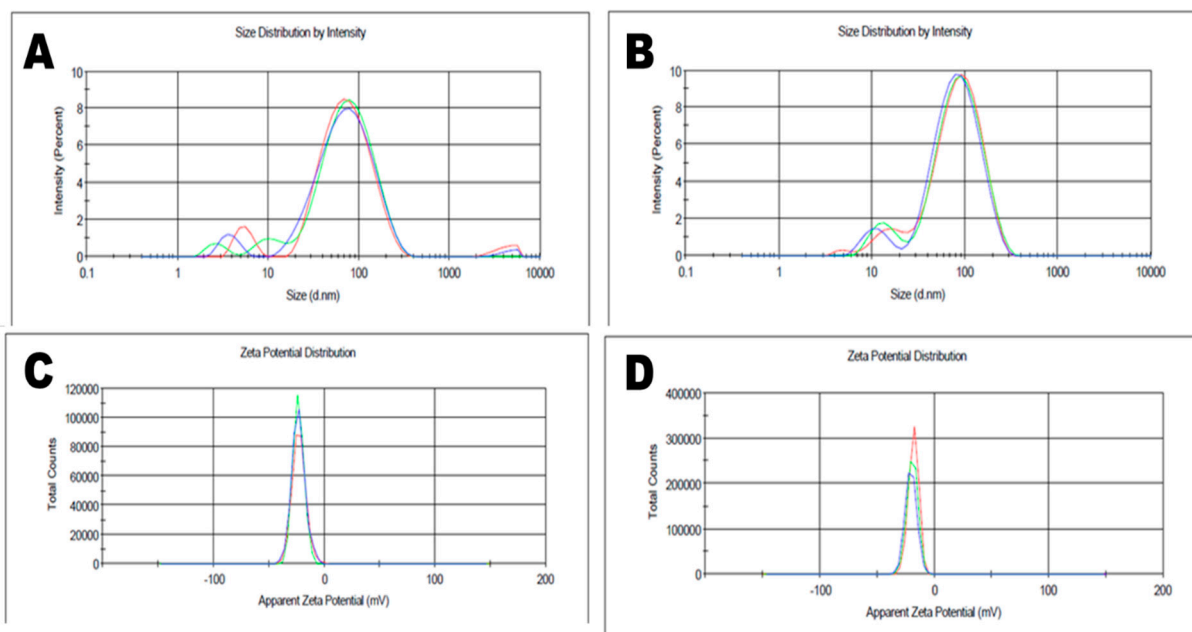

**Figure S4.** Particle size distribution of AuNPs using (A) 1 mL CE (B) 2 mL CE, Zeta potential distribution of AuNPs using (C) 1 mL CE (D) 2 mL CE after 60 days.

**Table S4.** DLS Analysis of AuNPs after 60 days.

| S/N | Sample Name   | Size (d. nm) | Zeta (mV) |
|-----|---------------|--------------|-----------|
| 1   | 1 mL CE AuNPs | 49.76        | -23.3     |
| 2   | 2 mL CE AuNPs | 58.25        | -20.4     |

**Table S5.** Antibacterial Activity of AuNPs using 1 mL and 2 mL of CE by MIC.

| S/N | Bacterial Strain                                   | Gram +/- | 1 mL CE AuNPs (µg/mL) | 2 mL CE AuNPs (µg/mL) | CE extract |
|-----|----------------------------------------------------|----------|-----------------------|-----------------------|------------|
| 1   | <i>Staphylococcus epidermidis</i> (Se) (ATCC14990) | +Ve      | 62.5                  | 62.5                  | -          |
| 2   | <i>Proteus mirabilis</i> (Pm) (ATCC 7002)          | -Ve      | 62.5                  | 62.5                  | -          |
| 3   | <i>Escherichia coli</i> (Ec) (ATCC 25922)          | -Ve      | 62.5                  | 62.5                  | -          |
| 4   | <i>Staphylococcus aureus</i> (Sa) (ATCC 25923)     | +Ve      | 62.5                  | 62.5                  | -          |
| 5   | <i>Klebsiella pneumoniae</i> (Kp) (ATCC 13822)     | -Ve      | 62.5                  | 62.5                  | 125        |
| 6   | <i>Klebsiella oxytoca</i> (Ko) (ATCC 8724)         | -Ve      | 62.5                  | 62.5                  | -          |
| 7   | <i>Mycobacterium smegmatis</i> (Ms) (MC 2155)      | +Ve      | 62.5                  | 62.5                  | 2000       |
| 8   | <i>Klebsiella aerogenes</i> (Ka) (ATCC 27853)      | -Ve      | 2000                  | 2000                  | -          |
| 9   | <i>Enterobacter cloacae</i> (Ecl) (ATCC 13047)     | -Ve      | 2000                  | -                     | -          |
| 10  | <i>Proteus vulgaris</i> (Pv) (ATCC 6380)           | -Ve      | 2000                  | -                     | -          |
| 11  | <i>Bacillus subtilis</i> (Bs) (ATCC 19659)         | +Ve_     | 2000                  | -                     | 2000       |
| 12  | <i>Enterococcus faecalis</i> (Ef) (ATCC 13047)     | +Ve      | -                     | -                     | -          |
